# Supplementary material
Source: Springer Nature journal article supplement (https://www.springerprofessional.de/resource/supplementary/13638_2011_154_MOESM1_ESM.pdf/11897168)

Mobile multimedia  
sensor node (MMN)

The longest path with  
maximum hop distance

sink

The 2<sup>nd</sup> longest path with  
adjusted hop distance

The shortest path with  
minimum hop distance

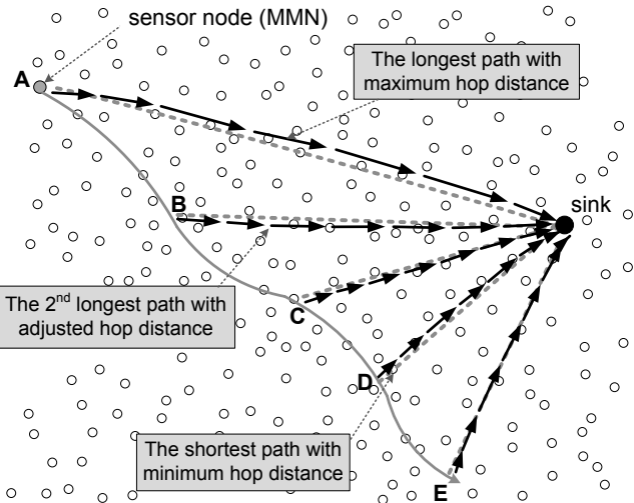

Supplement: MOESM1 [file 11897168]
